# Supplementary material
Source: Royal Society of Chemistry journal article supplement (doi:10.1039/d6fo00453a)
Supplement: d6fo00453a1.pdf [file d6fo00453a1.pdf]

## Supplementary materials

### **The dietary index for gut microbiota, genetically predicted gut microbiome and risk of chronic kidney disease: a cohort study**

Zheng Ma <sup>1,2\*</sup>, Yixiao Zhang <sup>3\*</sup>, Honghao Yang <sup>1,2</sup>, Gang Zheng <sup>1,2</sup>, Liuxin Li <sup>1,2</sup>,

Ruiyao Zhang<sup>1,2</sup>, Xiang Ji <sup>1,2</sup>, Chao Ji <sup>1,2</sup>, Yang Xia <sup>1,2,4#</sup>, Yuhong Zhao <sup>1,2#</sup>

# Correspondence to: Yang Xia or Yuhong Zhao.

## **Supplemental results**

**Supplementary Table 1.** The assessment for CKD in the UK Biobank cohort

**Supplementary Table 2.** Components and scoring criteria of DI-GM in UK Biobank

**Supplementary Table 3.** Characteristics of the 19 SNPs associated with gut microbiome abundance

**Supplementary Table 4.** SNPs used to construct the eGFR-GRS in the UK Biobank study

**Supplementary Figure 1.** Directed acyclic graph (DAG) for the associations of the DI-GM with the risk of CKD.

**Supplementary Table 5.** Baseline characteristics of participants according to categories of the DI-GM (n=166,865)

**Supplementary Figure 2.** The Cumulative Incidence of CKD according to categories of the DI-GM

**Supplementary Table 6.** Associations between the DI-GM and the risk of CKD when excluded participants who developed CKD within first 2 years of follow-up (n=165,805)

**Supplementary Table 7.** Associations between the DI-GM and the risk of CKD when excluded participants who developed CKD within first 5 years of follow-up (n=164,786)

**Supplementary Table 8.** Associations between the DI-GM and the risk of CKD when excluding participants who had a history of cancer or CVD (n=144,191)

**Supplementary Table 9.** Associations between the DI-GM and the risk of CKD when participants with at least 2 times 24-hour dietary recall questionnaire with typical diet and credible energy (n=89,896)

**Supplementary Table 10.** Associations between the DI-GM and the risk of CKD further adjusted for eGFR (n=166,364)

**Supplementary Table 11.** Associations between the DI-GM and the risk of CKD using competing risk regression (n=166,364)

**Supplementary Figure 3.** The dose-response association between the DI-GM and risk of CKD diabetes using restricted cubic spline with three knots

**Supplementary Figure 4.** The dose-response association between the DI-GM and risk of CKD diabetes using restricted cubic spline with four knots

**Supplementary Table 12.** Associations between the DI-GM and the risk of CKD including participants lost to follow-up (n=166,821)

**Supplementary Table 13.** Associations between the DI-GM and the risk of CKD further adjusted for history of antibiotic use, history of bowel resection surgery, and IBD (n=166,364)

**Supplementary Table 14.** Associations between the DI-GM and the risk of CKD excluding participants who history of antibiotic use, history of bowel resection surgery, and IBD (n=151,160).

**Supplementary Figure 5.** Associations of the DI-GM with the risk of CKD according to genetically predicted gut microbial abundance, additionally adjusted for antibiotic use, bowel resection surgery, and IBD history

**Supplement Table 1.** The assessment for CKD in the UK Biobank cohort <sup>a</sup>.

| Diagnosed diseases   | UK Biobank algorithm <sup>b</sup> | ICD-10 codes               | Self-reported codes <sup>c</sup> | OPCS-4 codes                          | Others                                              |
|----------------------|-----------------------------------|----------------------------|----------------------------------|---------------------------------------|-----------------------------------------------------|
| At baseline          |                                   |                            |                                  |                                       |                                                     |
| CKD                  | 131290 (Date I12 first reported)  |                            |                                  |                                       | eGFR<60 mL/min/1.73 m <sup>2</sup> or UACR >30 mg/g |
|                      | 131292 (Date I13 first reported)  | E10.2, E11.2, T86.1, Z94.0 | 1192, 1193, 1194, 1196           | L74, M01, M02.3, M08.4, M17, X40, X41 |                                                     |
|                      | 132032 (Date N18 first reported)  |                            |                                  |                                       |                                                     |
| During the follow-up |                                   |                            |                                  |                                       |                                                     |
| CKD                  | 131290 (Date I12 first reported)  |                            |                                  |                                       | -                                                   |
|                      | 131292 (Date I13 first reported)  | E10.2, E11.2, T86.1, Z94.0 | -                                | L74, M01, M02.3, M08.4, M17, X40, X41 |                                                     |
|                      | 132032 (Date N18 first reported)  |                            |                                  |                                       |                                                     |

<sup>a</sup> Abbreviations: CKD, chronic kidney disease; eGFR, estimated glomerular filtration rate; ICD-10, International Classification of Disease, 10th version; OPCS-4, Office of Population Censuses and Surveys Classification of Interventions and Procedures, version 4; UACR, urinary albumin-to-creatinine ratio.

<sup>b</sup> "Date of disease (shown as ICD-10 codes) first reported" captures data from multiple sources, including primary care records, hospital inpatient records, self-reported medical conditions, and death registers. This algorithm is implemented by the UK Biobank team. The numbers in the table represent UKB field IDs (e.g., 131290).

<sup>c</sup> Self-reported codes for non-cancer illness (field ID: 20002).

**Supplementary Table 2.** Components and scoring criteria of DI-GM in UK Biobank.

| Components of DI-GM           | Food items included in UK Biobank                                                          | Scoring criteria                                                   |
|-------------------------------|--------------------------------------------------------------------------------------------|--------------------------------------------------------------------|
| Beneficial to gut microbiota  | Avocados                                                                                   | Score 1 - Consumption > sex-specific median<br>Score 0 - Otherwise |
|                               | Broccoli                                                                                   |                                                                    |
|                               | Pulses (including kidney beans/Chickpeas/butter beans etc.)                                |                                                                    |
|                               | Coffee                                                                                     |                                                                    |
|                               | Dried fruit (including e.g., raisins, apple rings, Cranberries (not with breakfast cereal) |                                                                    |
|                               | Fermented dairy                                                                            |                                                                    |
|                               | Fiber                                                                                      |                                                                    |
|                               | green tea                                                                                  |                                                                    |
|                               | Soybean                                                                                    |                                                                    |
|                               | Whole grains                                                                               |                                                                    |
| Unfavorable to gut microbiota | Refined grains                                                                             | Score 0 - Consumption $\leq$ sex-specific median                   |
|                               | Processed meat                                                                             |                                                                    |
|                               | Red meat                                                                                   | Score 1 - Otherwise                                                |
|                               | High-fat diet (% energy)                                                                   | Score 0 - Consumption $\geq$ 40%                                   |

**Supplementary Table 3.** Characteristics of the 19 SNPs associated with gut microbiome abundance <sup>a</sup>.

| SNP        | Effect Allele | Chr | Beta     | Phylum         |
|------------|---------------|-----|----------|----------------|
| rs10769159 | G             | 11  | -0.06403 | Firmicutes     |
| rs10805326 | G             | 4   | 0.077515 | Firmicutes     |
| rs11098863 | T             | 4   | -0.0966  | Actinobacteria |
| rs11110281 | T             | 12  | -0.13404 | Firmicutes     |
| rs12320842 | C             | 12  | 0.094833 | Firmicutes     |
| rs12781711 | C             | 10  | -0.06561 | Firmicutes     |
| rs17159861 | C             | 7   | 0.096223 | Firmicutes     |
| rs182549   | C             | 2   | 0.116333 | Actinobacteria |
| rs4428215  | G             | 3   | 0.12561  | Proteobacteria |
| rs602075   | A             | 9   | 0.168974 | Firmicutes     |
| rs61841503 | G             | 10  | 0.092427 | Firmicutes     |
| rs67476743 | T             | 19  | 0.132164 | Firmicutes     |
| rs7221249  | A             | 17  | 0.083986 | Firmicutes     |
| rs7322849  | T             | 13  | 0.11126  | Actinobacteria |
| rs736744   | C             | 9   | 0.117882 | Proteobacteria |
| rs75754569 | C             | 3   | 0.181434 | Firmicutes     |
| rs8009993  | G             | 14  | -0.13594 | Firmicutes     |
| rs830151   | G             | 19  | 0.194561 | Firmicutes     |
| rs9864379  | A             | 3   | -0.16052 | Cyanobacteria  |

Abbreviations: SNP, single nucleotide polymorphism; Chr, chromosome.

**Supplementary Table 4.** SNPs used to construct the eGFR-GRS in the UK Biobank study <sup>a</sup>.

| SNP        | Effect Allele | Chr | Effect  | Locus        |
|------------|---------------|-----|---------|--------------|
| rs61830291 | A             | 1   | -0.0036 | LINC01352    |
| rs2490391  | A             | 1   | -0.0024 | SDCCAG8      |
| rs12061708 | A             | 1   | -0.0026 | KLHDC7A      |
| rs2749153  | A             | 1   | -0.0033 | ZNF436-AS1   |
| rs688540   | A             | 1   | -0.003  | FOXD2        |
| rs3845534  | A             | 1   | -0.0019 | LOC100422212 |
| rs1011731  | A             | 1   | -0.0019 | DNM3         |
| rs78444298 | A             | 1   | -0.0105 | EDEM3        |
| rs78329830 | A             | 1   | -0.0054 | PLA2G4A      |
| rs1887252  | C             | 1   | -0.0019 | LINC01362    |
| rs7543734  | C             | 1   | 0.0031  | BCAR3        |
| rs74748843 | T             | 1   | -0.0048 | CASZ1        |
| rs659437   | T             | 1   | -0.0027 | AKR1A1       |
| rs10159261 | T             | 1   | -0.0034 | AGMAT        |
| rs267738   | T             | 1   | -0.0048 | CERS2        |
| rs17413465 | A             | 1   | 0.0025  | MIR4422HG    |
| rs11211257 | A             | 1   | 0.0027  | PIK3R3       |
| rs1757915  | A             | 1   | 0.0021  | LINC01755    |
| rs11166440 | A             | 1   | 0.002   | CDC14A       |
| rs10857788 | A             | 1   | 0.003   | SYPL2        |
| rs4971100  | A             | 1   | 0.002   | TRIM46       |
| rs3850625  | A             | 1   | 0.0046  | CACNA1S      |
| rs2808454  | A             | 1   | 0.0019  | PFKFB2       |
| rs12736457 | C             | 1   | 0.0054  | PPM1J        |
| rs75625374 | C             | 1   | 0.0045  | CD34         |
| rs7536433  | T             | 1   | 0.0021  | AK5          |
| rs679843   | T             | 1   | 0.0021  | MGC27382     |
| rs3118119  | T             | 1   | 0.003   | LOC105371433 |
| rs4656220  | T             | 1   | 0.002   | PRRX1        |
| rs3795503  | T             | 1   | 0.002   | KIAA1614     |
| rs7535253  | T             | 1   | 0.0021  | PTPN14       |
| rs2577134  | T             | 1   | 0.002   | RNU5F-1      |
| rs417237   | T             | 1   | 0.0018  | OBSCN        |
| rs1047891  | A             | 2   | -0.0065 | CPS1         |
| rs17050272 | A             | 2   | -0.0022 | LINC01101    |
| rs2971880  | A             | 2   | -0.0024 | SPTBN1       |
| rs60980181 | A             | 2   | -0.0027 | CALCRL       |

|             |   |   |         |             |
|-------------|---|---|---------|-------------|
| rs4664475   | T | 2 | -0.002  | NEB         |
| rs35472707  | T | 2 | -0.0073 | LRP2        |
| rs2301343   | T | 2 | -0.0023 | SLC8A1      |
| rs35284526  | A | 2 | 0.0029  | NFE2L2      |
| rs4491726   | A | 2 | 0.0032  | RDH14       |
| rs6546869   | A | 2 | 0.0059  | ALMS1P1     |
| rs11694902  | A | 2 | 0.0041  | TFCP2L1     |
| rs7425436   | A | 2 | 0.0024  | ORC4        |
| rs35669853  | A | 2 | 0.0024  | MIR5702     |
| rs10197255  | A | 2 | 0.0018  | LINC01812   |
| rs10865189  | C | 2 | 0.0024  | ZFP36L2     |
| rs187355703 | C | 2 | 0.01    | HOXD8       |
| rs780093    | T | 2 | 0.0044  | GCKR        |
| rs11123169  | T | 2 | 0.0025  | PSD4        |
| rs1548945   | T | 2 | 0.0036  | TNP1        |
| rs1050816   | T | 2 | 0.0026  | SPEG        |
| rs13003198  | T | 2 | 0.0018  | SAG         |
| rs807624    | T | 2 | 0.0032  | DDX1        |
| rs4666821   | T | 2 | 0.002   | PDE1A       |
| rs3791221   | A | 2 | 0.0022  | SH3YL1      |
| rs6779998   | A | 3 | -0.0017 | TGFBR2      |
| rs4625      | A | 3 | -0.0023 | DAG1        |
| rs9828976   | C | 3 | -0.0024 | SLC35G2     |
| rs56065557  | C | 3 | -0.0029 | SENP2       |
| rs6778731   | T | 3 | -0.0017 | WNT7A       |
| rs3774726   | T | 3 | -0.0021 | ATXN7       |
| rs2289746   | T | 3 | -0.0019 | CBLB        |
| rs35320690  | T | 3 | -0.0025 | MSL2        |
| rs11919484  | T | 3 | -0.0026 | KNG1        |
| rs2581820   | A | 3 | 0.0021  | SFMBT1      |
| rs9868185   | A | 3 | 0.0026  | SLC15A2     |
| rs1397764   | A | 3 | 0.0043  | TFDP2       |
| rs9823161   | A | 3 | 0.0022  | LINC02028   |
| rs11914389  | T | 3 | 0.003   | ACVR2B      |
| rs7651407   | T | 3 | 0.0025  | PLXNB1      |
| rs10934754  | T | 3 | 0.002   | ALDH1L1-AS2 |
| rs7624084   | T | 3 | 0.0017  | ZBTB38      |
| rs76272256  | T | 3 | 0.0024  | MECOM       |
| rs795009    | T | 3 | 0.002   | SYN2        |
| rs3775932   | A | 4 | -0.0018 | WDR1        |

|             |   |   |         |              |
|-------------|---|---|---------|--------------|
| rs16874073  | T | 4 | -0.0045 | PPARGC1A     |
| rs4864890   | T | 4 | -0.0023 | DCUN1D4      |
| rs12509595  | T | 4 | -0.0035 | FGF5         |
| rs75501914  | A | 4 | 0.0039  | HGFAC        |
| rs71606723  | A | 4 | 0.0025  | UGT8         |
| rs223471    | C | 4 | 0.0028  | LOC102723704 |
| rs55929207  | C | 4 | 0.0019  | ETNPPL       |
| rs28817415  | T | 4 | -0.0073 | SHROOM3      |
| rs12163971  | A | 5 | -0.0029 | AFF4         |
| rs13159523  | A | 5 | -0.0024 | TPPP         |
| rs13157326  | A | 5 | -0.0027 | RAI14        |
| rs2010352   | A | 5 | -0.0018 | AK6          |
| rs1362800   | T | 5 | -0.0049 | DAB2         |
| rs3812036   | T | 5 | -0.0065 | SLC34A1      |
| rs72759880  | T | 5 | -0.0056 | PIK3R1       |
| rs3797537   | A | 5 | 0.0019  | DMGDH        |
| rs12520984  | C | 5 | 0.0019  | FST          |
| rs12777     | C | 5 | 0.005   | SLC22A4      |
| rs11746506  | T | 5 | 0.0017  | MRPS30       |
| rs11743174  | T | 5 | 0.0019  | ABLIM3       |
| rs495237    | T | 5 | 0.0027  | LINC00603    |
| rs79760705  | T | 5 | 0.0056  | ARL15        |
| rs881858    | A | 6 | -0.0054 | LINC01512    |
| rs72912510  | A | 6 | -0.0024 | RRAGD        |
| rs9375818   | A | 6 | -0.0031 | ARG1         |
| rs3822939   | A | 6 | -0.0025 | EYA4         |
| rs12207180  | A | 6 | -0.0085 | SLC22A2      |
| rs12212034  | T | 6 | -0.0018 | PKHD1        |
| rs6458868   | T | 6 | -0.002  | GSTA2        |
| rs3925003   | T | 6 | -0.0018 | HMGCLL1      |
| rs13200335  | A | 6 | 0.0024  | TFEB         |
| rs11755724  | A | 6 | 0.0027  | RREB1        |
| rs1857859   | A | 6 | 0.0019  | SIM1         |
| rs1268168   | A | 6 | 0.0024  | FOXO3        |
| rs9397738   | A | 6 | 0.0027  | SCAF8        |
| rs77915916  | A | 6 | 0.0046  | CRIP3        |
| rs7740107   | A | 6 | 0.0027  | L3MBTL3      |
| rs3765502   | T | 6 | 0.0024  | DCDC2        |
| rs144100226 | T | 6 | 0.0059  | HMGAI1       |
| rs720989    | T | 6 | 0.0021  | SUPT3H       |

|            |   |    |         |              |
|------------|---|----|---------|--------------|
| rs35154268 | A | 7  | -0.0022 | SND1         |
| rs6968554  | A | 7  | -0.0019 | AHR          |
| rs62491533 | T | 7  | -0.0027 | UBE2H        |
| rs10254101 | T | 7  | -0.0068 | PRKAG2       |
| rs62435145 | T | 7  | -0.006  | UNCX         |
| rs3750081  | T | 7  | -0.0022 | KBTBD2       |
| rs801193   | T | 7  | -0.002  | GS1-124K5.11 |
| rs6973656  | A | 7  | 0.0035  | TMEM60       |
| rs700753   | C | 7  | 0.0031  | LOC730338    |
| rs55773927 | T | 7  | 0.0019  | VKORC1L1     |
| rs41301394 | T | 7  | 0.0023  | POR          |
| rs3757387  | T | 7  | 0.003   | IRF5         |
| rs12671694 | T | 7  | 0.0025  | SHH          |
| rs868822   | T | 7  | 0.0029  | LINC01006    |
| rs11783418 | A | 8  | -0.002  | XKR6         |
| rs10102889 | C | 8  | -0.0036 | NRG1         |
| rs2976178  | C | 8  | -0.0025 | WWP1         |
| rs2980423  | T | 8  | -0.0023 | PRAG1        |
| rs35353426 | T | 8  | -0.0026 | LOC157273    |
| rs10098664 | T | 8  | -0.0021 | BLK          |
| rs34861762 | T | 8  | -0.0043 | STC1         |
| rs1533059  | A | 8  | 0.0025  | MFHAS1       |
| rs7832708  | T | 8  | 0.0022  | MSRA         |
| rs2954017  | T | 8  | 0.0024  | TRIB1        |
| rs12377027 | A | 9  | -0.0026 | MLLT3        |
| rs13287724 | A | 9  | -0.003  | B4GALT1-AS1  |
| rs1321917  | C | 9  | -0.0023 | ASTN2        |
| rs544169   | A | 9  | 0.0022  | UBAP2        |
| rs2039424  | A | 9  | 0.0044  | PIP5K1B      |
| rs7024579  | T | 9  | 0.0023  | QSOX2        |
| rs2068888  | A | 10 | -0.0024 | CYP26A1      |
| rs4918943  | A | 10 | -0.0022 | SORBS1       |
| rs12240572 | A | 10 | -0.0032 | DNAJC9-AS1   |
| rs7095954  | A | 10 | -0.0018 | TSPAN14      |
| rs816850   | C | 10 | -0.002  | KCNMA1       |
| rs1536225  | T | 10 | -0.0021 | PDCD11       |
| rs7072591  | A | 10 | 0.0019  | PARD3-AS1    |
| rs10821905 | A | 10 | 0.0037  | A1CF         |
| rs1055256  | A | 10 | 0.0025  | EEF1AKMT2    |
| rs80282103 | A | 10 | 0.0078  | LARP4B       |

|             |   |    |         |           |
|-------------|---|----|---------|-----------|
| rs6481598   | C | 10 | 0.0024  | SVIL      |
| rs8474      | C | 10 | 0.002   | PARG      |
| rs7475348   | T | 10 | 0.0031  | MYPN      |
| rs9420446   | T | 10 | 0.0023  | FAM35A    |
| rs10821944  | T | 10 | 0.002   | ARID5B    |
| rs284859    | T | 10 | 0.0026  | WBP1L     |
| rs1541937   | A | 11 | -0.0029 | OR52H1    |
| rs1783827   | A | 11 | -0.002  | MIR130A   |
| rs3892895   | A | 11 | -0.0023 | TPCN2     |
| rs963837    | T | 11 | -0.0057 | DCDC1     |
| rs6484504   | T | 11 | -0.0026 | DNAJC24   |
| rs2727040   | T | 11 | -0.0026 | TRIM49B   |
| rs948493    | T | 11 | -0.0033 | MIR1234   |
| rs11237450  | A | 11 | 0.0032  | GAB2      |
| rs63934     | A | 11 | 0.0041  | KCNQ1     |
| rs6589750   | A | 11 | 0.002   | USP2-AS1  |
| rs11564722  | T | 11 | 0.0033  | INS-IGF2  |
| rs61897431  | T | 11 | 0.0029  | SLC39A13  |
| rs7127946   | T | 11 | 0.0023  | OR4B1     |
| rs1813937   | T | 11 | 0.0022  | LOC646813 |
| rs10790452  | T | 11 | 0.002   | SORL1     |
| rs10846157  | A | 12 | -0.0034 | RERG      |
| rs11062167  | A | 12 | -0.0039 | SLC6A13   |
| rs632887    | A | 12 | 0.0032  | TSPAN9    |
| rs117113238 | A | 12 | 0.0039  | BCL2L14   |
| rs2634675   | A | 12 | 0.0025  | ZNF641    |
| rs1275609   | A | 12 | 0.0024  | PHLDA1    |
| rs4238020   | T | 12 | 0.0029  | C12orf4   |
| rs12313306  | T | 12 | 0.0029  | R3HDM2    |
| rs41284816  | T | 13 | -0.0078 | DLEU2     |
| rs500830    | T | 13 | 0.0029  | DACH1     |
| rs61993680  | A | 14 | -0.0019 | SLC25A29  |
| rs72683923  | T | 14 | -0.0074 | L2HGDH    |
| rs6574652   | T | 14 | -0.0017 | STON2     |
| rs17184313  | T | 14 | -0.0029 | RIN3      |
| rs1028455   | A | 14 | 0.002   | SPATA7    |
| rs690428    | A | 15 | -0.0039 | WDR72     |
| rs1994887   | A | 15 | -0.002  | CGNL1     |
| rs351237    | A | 15 | -0.0018 | STRA6     |
| rs4886696   | A | 15 | -0.0032 | SIN3A     |

|            |   |    |         |           |
|------------|---|----|---------|-----------|
| rs6492982  | T | 15 | -0.0033 | INO80     |
| rs11071738 | T | 15 | -0.0025 | APH1B     |
| rs11071939 | T | 15 | -0.0039 | SMAD3     |
| rs1145077  | T | 15 | -0.0085 | GATM      |
| rs59646751 | T | 15 | -0.0023 | IGF1R     |
| rs4886755  | A | 15 | 0.0041  | NRG4      |
| rs17507300 | A | 15 | 0.0024  | BTBD1     |
| rs7169629  | C | 15 | 0.0018  | WDR73     |
| rs12913015 | T | 15 | 0.0027  | C15orf54  |
| rs956006   | T | 15 | 0.0019  | MGC15885  |
| rs2472297  | T | 15 | 0.0039  | CYP1A1    |
| rs166906   | T | 15 | 0.0033  | SCAPER    |
| rs9932625  | A | 16 | -0.003  | LINC01571 |
| rs28581385 | A | 16 | -0.0028 | LINC01229 |
| rs154656   | A | 16 | -0.003  | CHMP1A    |
| rs1635404  | T | 16 | -0.0025 | TRAP1     |
| rs193538   | T | 16 | -0.002  | ABCC1     |
| rs7185391  | T | 16 | -0.0027 | SLC7A6    |
| rs62053077 | T | 16 | -0.0021 | MARVELD3  |
| rs7203398  | A | 16 | 0.0025  | CHD9      |
| rs77924615 | A | 16 | 0.0098  | PDILT     |
| rs62050038 | A | 16 | 0.0028  | WWP2      |
| rs438339   | T | 16 | 0.0035  | RPL3L     |
| rs1858800  | T | 16 | 0.002   | ZFX3      |
| rs883541   | A | 17 | -0.0022 | PRKAR1A   |
| rs2411192  | A | 17 | -0.0024 | MYO19     |
| rs8866     | C | 17 | -0.0018 | PITPNC1   |
| rs2349648  | T | 17 | -0.0017 | MPRIP     |
| rs4794813  | A | 17 | 0.0055  | CDK12     |
| rs35662455 | C | 17 | 0.003   | TEX14     |
| rs9903801  | C | 17 | 0.0047  | BCAS3     |
| rs9891340  | T | 17 | 0.0024  | SMCR2     |
| rs2440165  | T | 17 | 0.004   | SLC47A1   |
| rs9895661  | T | 17 | 0.0069  | BCAS3     |
| rs28735420 | T | 17 | 0.0039  | MAP2K4    |
| rs227731   | T | 17 | 0.0018  | C17orf67  |
| rs16942751 | A | 18 | -0.0029 | AQP4      |
| rs1719934  | A | 18 | 0.0026  | EPB41L3   |
| rs8096658  | C | 18 | 0.005   | NFATC1    |
| rs4940525  | T | 18 | 0.0025  | LINC01544 |

|             |   |    |         |              |
|-------------|---|----|---------|--------------|
| rs34647824  | A | 19 | -0.0021 | RRAS         |
| rs78241494  | T | 19 | -0.003  | ZNF585A      |
| rs281380    | T | 19 | -0.0021 | MAMSTR       |
| rs2974751   | A | 19 | 0.0018  | CALR         |
| rs8101667   | T | 19 | 0.0044  | CEP89        |
| rs7251730   | T | 19 | 0.0024  | ZNF260       |
| rs113445505 | T | 19 | 0.0037  | ZNF781       |
| rs6087579   | A | 20 | -0.0028 | ITCH         |
| rs4408777   | A | 20 | -0.0021 | RGS19        |
| rs2235826   | A | 20 | -0.003  | PCK1         |
| rs1041606   | T | 20 | -0.0021 | MACROD2      |
| rs17216707  | T | 20 | -0.0051 | CYP24A1      |
| rs1509117   | A | 20 | 0.0024  | PLCB1        |
| rs72629024  | C | 20 | 0.0035  | PPDPF        |
| rs62187537  | T | 20 | 0.0039  | FKBP1ASDCBP2 |
| rs1407040   | T | 20 | 0.0018  | GNAS         |
| rs35636653  | T | 20 | 0.0022  | OSBPL2       |
| rs2273684   | T | 20 | 0.0032  | GSS          |
| rs2823139   | A | 21 | -0.0026 | NRIP1        |
| rs2834317   | A | 21 | -0.0035 | LOC101928126 |
| rs2244237   | T | 21 | 0.0027  | CLDN14       |
| rs80576     | A | 22 | -0.0028 | APOL3        |
| rs4820324   | C | 22 | -0.0023 | MAFF         |
| rs131263    | T | 22 | 0.0024  | ZMAT5        |
| rs112880707 | T | 22 | 0.0052  | MKL1         |
| rs738527    | T | 22 | 0.0032  | A4GALT       |

---

Abbreviations: SNP, single nucleotide polymorphism; eGFR, estimated glomerular filtration rate; GRS, genetic risk score; Chr, chromosome.

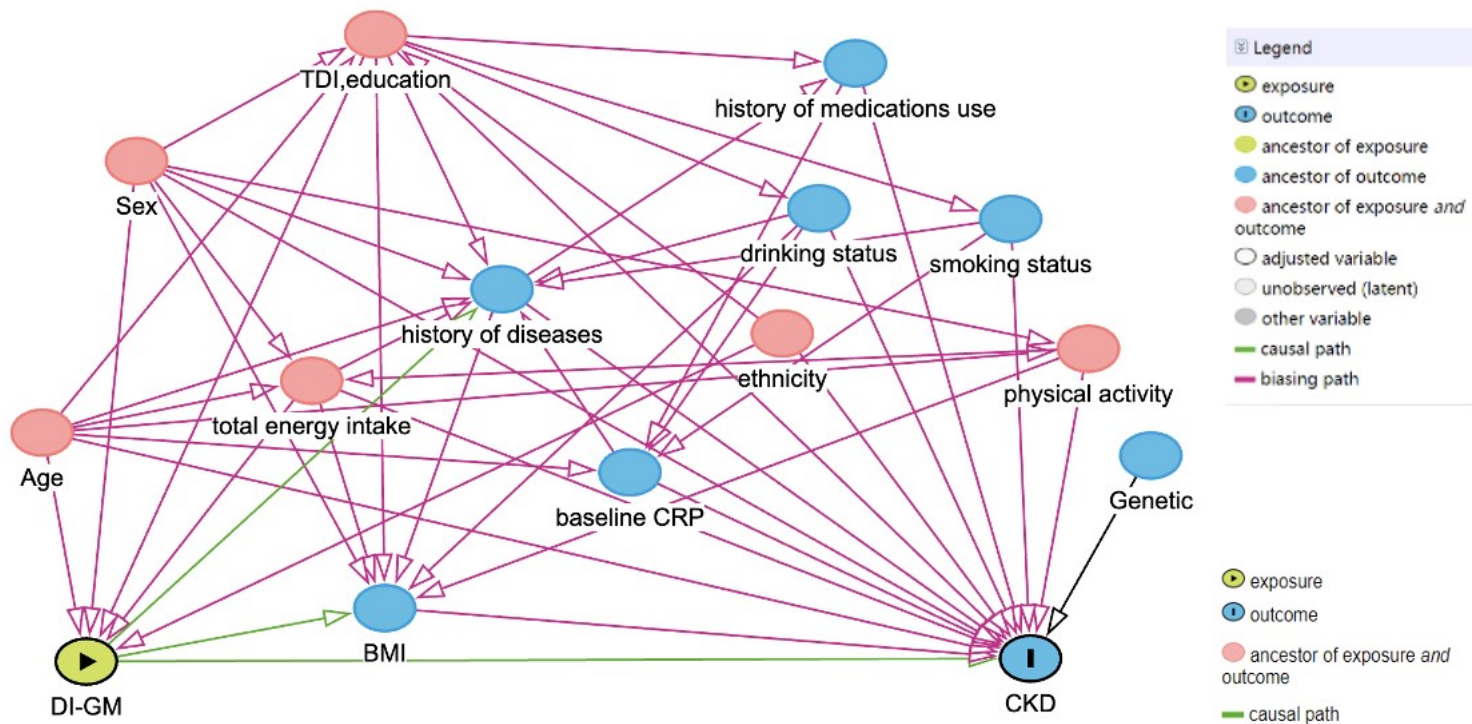

**Supplementary Figure 1.** Directed acyclic graph for the associations of the DI-GM with the risk of CKD.

Abbreviations: DI-GM, dietary index for gut microbiota; CKD, chronic kidney disease; BMI, body mass index; TDI, Townsend deprivation index; CRP, C-reactive protein.

**Supplementary Table 5.** Baseline characteristics of participants according to categories of the DI-GM (n=166,364) <sup>a</sup>.

| Characteristics                         | DI-GM            |                 |                 |                  | <i>P</i> -value |
|-----------------------------------------|------------------|-----------------|-----------------|------------------|-----------------|
|                                         | 0–3 (n = 54,747) | 4 (n = 34,904)  | 5 (n = 31,705)  | ≥ 6 (n = 45,008) |                 |
| <b>Demographic information</b>          |                  |                 |                 |                  |                 |
| Age at recruitment (years)              | 55.1 (7.97)      | 56.0 (7.95)     | 56.4 (7.84)     | 56.8 (7.74)      | <0.0001         |
| Sex (female, %)                         | 50.0             | 53.6            | 55.8            | 60.9             | <0.0001         |
| Race (white, %)                         | 95.0             | 95.8            | 96.1            | 96.3             | <0.0001         |
| Education level (≥ College graduate, %) | 37.4             | 41.1            | 43.8            | 50.3             | <0.0001         |
| Townsend Deprivation Index              | -1.49 (2.92)     | -1.62 (2.84)    | -1.73 (2.79)    | -1.66 (2.83)     | <0.0001         |
| <b>Lifestyles</b>                       |                  |                 |                 |                  |                 |
| Smoking status (%)                      |                  |                 |                 |                  | <0.0001         |
| Current smoker                          | 10.2             | 8.08            | 6.64            | 5.15             |                 |
| Ex-smoker                               | 34.4             | 35.8            | 35.6            | 35.9             |                 |
| Non-smoker                              | 55.5             | 56.1            | 57.8            | 59.0             |                 |
| Alcohol drinking status (%)             |                  |                 |                 |                  | 0.004           |
| Current drinker                         | 93.9             | 94.1            | 93.7            | 93.5             |                 |
| Ex-drinker                              | 2.76             | 2.87            | 3.09            | 3.47             |                 |
| Non-drinker                             | 3.31             | 3.02            | 3.26            | 3.03             |                 |
| Physical activity (%)                   |                  |                 |                 |                  | <0.0001         |
| Low                                     | 21.5             | 18.8            | 16.6            | 13.5             |                 |
| Moderate                                | 42.7             | 42.6            | 42.8            | 41.2             |                 |
| High                                    | 35.8             | 38.7            | 40.6            | 45.2             |                 |
| Total energy intake (kJ/day)            | 8220.0 (2324.3)  | 8406.2 (2466.8) | 8668.0 (2443.3) | 8889.7 (2314.1)  | <0.0001         |
| <b>Anthropometric indexes</b>           |                  |                 |                 |                  |                 |
| BMI (kg/m <sup>2</sup> )                | 27.4 (4.71)      | 27.0 (4.55)     | 26.7 (4.38)     | 26.0 (4.27)      | <0.0001         |

**Blood pressure and biochemistry**

|                                          |              |              |              |              |         |
|------------------------------------------|--------------|--------------|--------------|--------------|---------|
| SBP (mmHg)                               | 136.8 (17.9) | 136.7 (17.9) | 136.3 (18.1) | 135.5 (18.1) | <0.0001 |
| DBP (mmHg)                               | 82.4 (10.0)  | 81.9 (9.89)  | 81.4 (9.84)  | 80.7 (9.80)  | <0.0001 |
| eGFR (mL/min/1.73 m <sup>2</sup> )       | 91.9 (11.9)  | 92.0 (11.7)  | 92.1 (11.5)  | 92.9 (11.3)  | <0.0001 |
| CRP (mg/L)                               | 2.52 (4.19)  | 2.34 (3.97)  | 2.16 (3.78)  | 1.92 (3.45)  | <0.0001 |
| <b>Individual history of disease (%)</b> |              |              |              |              |         |
| Diabetes                                 | 5.85         | 5.48         | 5.48         | 4.17         | <0.0001 |
| Hypertension                             | 52.6         | 51.3         | 50.0         | 47.2         | <0.0001 |
| CVD                                      | 4.14         | 4.02         | 3.86         | 3.38         | <0.0001 |
| Cancer                                   | 9.17         | 9.63         | 10.00        | 11.1         | <0.0001 |
| Antihypertensive medication use (%)      | 18.2         | 17.7         | 16.0         | 14.4         | <0.0001 |
| Cholesterol-lowering medication use (%)  | 15.1         | 14.7         | 14.4         | 12.6         | <0.0001 |

<sup>a</sup> Abbreviations: DI-GM, dietary index for gut microbiota; CKD, chronic kidney disease; BMI, body mass index; SBP, systolic blood pressure; DBP, diastolic blood pressure; eGFR, estimated glomerular filtration rate; CRP, C-reactive protein; CVD, cardiovascular disease.

<sup>b</sup> Continuous variables are expressed as mean (standard deviation) and categorical variables are expressed as percentages.

<sup>c</sup> Analysis of variance or logistic regression.

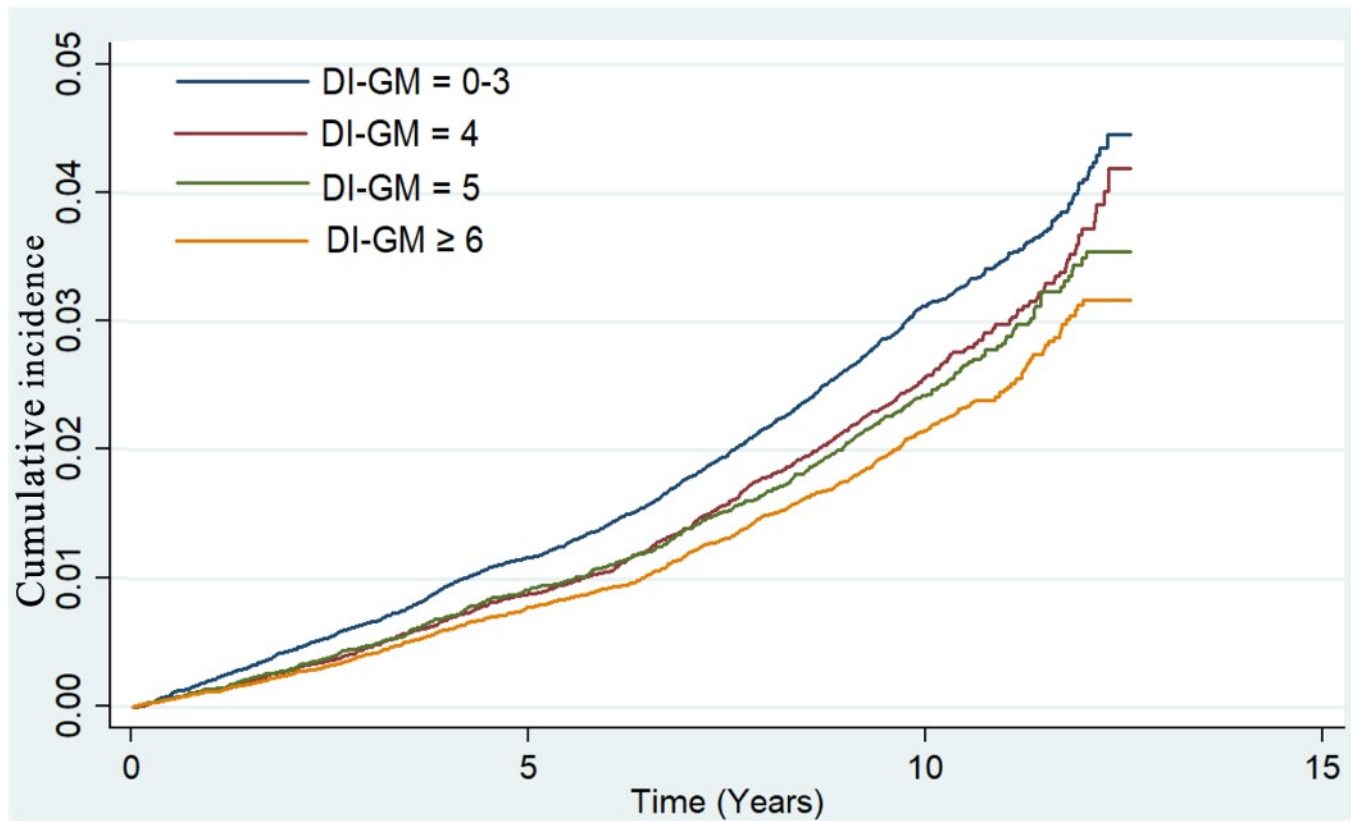

**Supplementary Figure 2. The Cumulative Incidence of CKD according to categories of the DI-GM**

Abbreviations: CKD, chronic kidney disease; DI-GM, dietary index for gut microbiota.

**Supplementary Table 6.** Associations between the DI-GM and the risk of CKD when excluded participants who developed CKD within first 2 years of follow-up (n=165,805) <sup>a</sup>.

| □                      | DI-GM            |                                |                   |                   | <i>P</i> for trend <sup>b</sup> |
|------------------------|------------------|--------------------------------|-------------------|-------------------|---------------------------------|
|                        | 0-3              | 4                              | 5                 | ≥ 6               |                                 |
| Number of participants | 54,504           | 34,802                         | 31,610            | 44,889            | -                               |
| Number of cases        | 1,304            | 731                            | 622               | 761               | -                               |
| Person-years           | 501,843          | 322,519                        | 291,986           | 411,857           | -                               |
| Model 1 <sup>d</sup>   | 1.00 (reference) | 0.87 (0.79, 0.95) <sup>c</sup> | 0.82 (0.74, 0.90) | 0.72 (0.66, 0.78) | <0.0001                         |
| Model 2 <sup>e</sup>   | 1.00 (reference) | 0.82 (0.75, 0.89)              | 0.77 (0.70, 0.85) | 0.69 (0.63, 0.76) | <0.0001                         |
| Model 3 <sup>f</sup>   | 1.00 (reference) | 0.84 (0.76, 0.92)              | 0.81 (0.74, 0.89) | 0.76 (0.69, 0.83) | <0.0001                         |

<sup>a</sup> Abbreviations: DI-GM, dietary index for gut microbiota; CKD, chronic kidney disease; BMI, body mass index; CVD, cardiovascular disease; GRS, genetic risk score; CRP, C-reactive protein.

<sup>b</sup> Calculated by using DI-GM as a continuous variable.

<sup>c</sup> Hazard ratios (95% confidence interval) (all such values).

<sup>d</sup> Model 1 was a crude model.

<sup>e</sup> Model 2 was adjusted for age, sex, and BMI.

<sup>f</sup> Model 3 was further adjusted for ethnicity, education levels, Townsend deprivation index, smoking status, drinking status, physical activity, total energy intake, history of diseases (hypertension, diabetes, CVD, and cancer), use of anti-hypertensive and cholesterol-lowering medications, CKD-GRS, baseline CRP, the first 10 principal components of ancestry, and the genotype measurement batch.

**Supplementary Table 7.** Associations between the DI-GM and the risk of CKD when excluded participants who developed CKD within first 5 years of follow-up (n= 164,786) <sup>a</sup>.

| □                      | DI-GM            |                                |                   |                   | <i>P</i> for trend <sup>b</sup> |
|------------------------|------------------|--------------------------------|-------------------|-------------------|---------------------------------|
|                        | 0-3              | 4                              | 5                 | ≥ 6               |                                 |
| Number of participants | 54,115           | 34,599                         | 31,413            | 44,659            | -                               |
| Number of cases        | 915              | 528                            | 425               | 531               | -                               |
| Person-years           | 500,495          | 321,812                        | 291,293           | 411,046           | -                               |
| Model 1 <sup>d</sup>   | 1.00 (reference) | 0.89 (0.80, 0.99) <sup>c</sup> | 0.80 (0.71, 0.89) | 0.72 (0.64, 0.80) | <0.0001                         |
| Model 2 <sup>e</sup>   | 1.00 (reference) | 0.84 (0.75, 0.93)              | 0.75 (0.67, 0.84) | 0.69 (0.62, 0.77) | <0.0001                         |
| Model 3 <sup>f</sup>   | 1.00 (reference) | 0.85 (0.76, 0.95)              | 0.78 (0.70, 0.88) | 0.75 (0.67, 0.83) | <0.0001                         |

<sup>a</sup> Abbreviations: DI-GM, dietary index for gut microbiota; CKD, chronic kidney disease; BMI, body mass index; CVD, cardiovascular disease; GRS, genetic risk score; CRP, C-reactive protein.

<sup>b</sup> Calculated by using DI-GM as a continuous variable.

<sup>c</sup> Hazard ratios (95% confidence interval) (all such values).

<sup>d</sup> Model 1 was a crude model.

<sup>e</sup> Model 2 was adjusted for age, sex, and BMI.

<sup>f</sup> Model 3 was further adjusted for ethnicity, education levels, Townsend deprivation index, smoking status, drinking status, physical activity, total energy intake, history of diseases (hypertension, diabetes, CVD, and cancer), use of anti-hypertensive and cholesterol-lowering medications, CKD-GRS, baseline CRP, the first 10 principal components of ancestry, and the genotype measurement batch.

**Supplementary Table 8.** Associations between the DI-GM and the risk of CKD when excluding participants who had a history of cancer or CVD (n=144,191) <sup>a</sup>.

| □                      | DI-GM            |                   |                   |                   | <i>P</i> for trend <sup>b</sup> |
|------------------------|------------------|-------------------|-------------------|-------------------|---------------------------------|
|                        | 0-3              | 4                 | 5                 | ≥ 6               |                                 |
| Number of participants | 47,730           | 30,335            | 27,465            | 38,661            | -                               |
| Number of cases        | 1,150            | 624               | 522               | 626               | -                               |
| Person-years           | 438,829          | 280,731           | 253,287           | 353,756           | -                               |
| Model 1 <sup>d</sup>   | 1.00 (reference) | 0.85 (0.77, 0.93) | 0.79 (0.71, 0.87) | 0.68 (0.62, 0.75) | <0.0001                         |
| Model 2 <sup>e</sup>   | 1.00 (reference) | 0.80 (0.72, 0.88) | 0.73 (0.66, 0.81) | 0.65 (0.59, 0.72) | <0.0001                         |
| Model 3 <sup>f</sup>   | 1.00 (reference) | 0.82 (0.75, 0.91) | 0.78 (0.70, 0.86) | 0.70 (0.64, 0.78) | <0.0001                         |

<sup>a</sup> Abbreviations: DI-GM, dietary index for gut microbiota; CKD, chronic kidney disease; BMI, body mass index; CVD, cardiovascular disease; GRS, genetic risk score; CRP, C-reactive protein.

<sup>b</sup> Calculated by using DI-GM as a continuous variable.

<sup>c</sup> Hazard ratios (95% confidence interval) (all such values).

<sup>d</sup> Model 1 was a crude model.

<sup>e</sup> Model 2 was adjusted for age, sex, and BMI.

<sup>f</sup> Model 3 was further adjusted for ethnicity, education levels, Townsend deprivation index, smoking status, drinking status, physical activity, total energy intake, history of diseases (hypertension and diabetes), use of anti-hypertensive and cholesterol-lowering medications, CKD-GRS, baseline CRP, the first 10 principal components of ancestry, and the genotype measurement batch.

**Supplementary Table 9.** Associations between the DI-GM and the risk of CKD when participants with at least 2 times 24-hour dietary recall questionnaire with typical diet and credible energy (n=89,896) <sup>a</sup>.

| □                      | DI-GM            |                   |                   |                   | <i>P</i> for trend <sup>b</sup> |
|------------------------|------------------|-------------------|-------------------|-------------------|---------------------------------|
|                        | 0-3              | 4                 | 5                 | ≥ 6               |                                 |
| Number of participants | 29,429           | 17,397            | 16,399            | 26,671            | -                               |
| Number of cases        | 788              | 421               | 360               | 480               | -                               |
| Person-years           | 256,568          | 152,048           | 143,592           | 233,660           | -                               |
| Model 1 <sup>d</sup>   | 1.00 (reference) | 0.90 (0.80, 1.02) | 0.82 (0.72, 0.92) | 0.67 (0.60, 0.75) | <0.0001                         |
| Model 2 <sup>e</sup>   | 1.00 (reference) | 0.87 (0.77, 0.97) | 0.78 (0.69, 0.89) | 0.68 (0.61, 0.76) | <0.0001                         |
| Model 3 <sup>f</sup>   | 1.00 (reference) | 0.90 (0.80, 1.01) | 0.83 (0.73, 0.94) | 0.74 (0.66, 0.83) | <0.0001                         |

<sup>a</sup> Abbreviations: DI-GM, dietary index for gut microbiota; CKD, chronic kidney disease; BMI, body mass index; CVD, cardiovascular disease; GRS, genetic risk score; CRP, C-reactive protein.

<sup>b</sup> Calculated by using DI-GM as a continuous variable.

<sup>c</sup> Hazard ratios (95% confidence interval) (all such values).

<sup>d</sup> Model 1 was a crude model.

<sup>e</sup> Model 2 was adjusted for age, sex, and BMI.

<sup>f</sup> Model 3 was further adjusted for ethnicity, education levels, Townsend deprivation index, smoking status, drinking status, physical activity, total energy intake, history of diseases (hypertension, diabetes, CVD, and cancer), use of anti-hypertensive and cholesterol-lowering medications, CKD-GRS, baseline CRP, the first 10 principal components of ancestry, and the genotype measurement batch.

**Supplementary Table 10.** Associations between the DI-GM and the risk of CKD further adjusted for eGFR (n=166,364) <sup>a</sup>.

| □                      | DI-GM            |                                |                   |                   | <i>P</i> for trend <sup>b</sup> |
|------------------------|------------------|--------------------------------|-------------------|-------------------|---------------------------------|
|                        | 0-3              | 4                              | 5                 | ≥ 6               |                                 |
| Number of participants | 54,747           | 34,904                         | 31,705            | 45,008            | -                               |
| Number of cases        | 1,547            | 833                            | 717               | 880               | -                               |
| Person-years           | 502,093          | 322,627                        | 292,082           | 411,981           | -                               |
| Model 1 <sup>d</sup>   | 1.00 (reference) | 0.84 (0.77, 0.91) <sup>c</sup> | 0.80 (0.73, 0.87) | 0.70 (0.64, 0.76) | <0.0001                         |
| Model 2 <sup>e</sup>   | 1.00 (reference) | 0.78 (0.72, 0.85)              | 0.75 (0.68, 0.82) | 0.67 (0.62, 0.73) | <0.0001                         |
| Model 3 <sup>f</sup>   | 1.00 (reference) | 0.84 (0.77, 0.91)              | 0.85 (0.78, 0.93) | 0.85 (0.78, 0.92) | 0.0003                          |

<sup>a</sup> Abbreviations: DI-GM, dietary index for gut microbiota; CKD, chronic kidney disease; eGFR, estimated glomerular filtration rate; BMI, body mass index; CVD, cardiovascular disease; GRS, genetic risk score; CRP, C-reactive protein.

<sup>b</sup> Calculated by using DI-GM as a continuous variable.

<sup>c</sup> Hazard ratios (95% confidence interval) (all such values).

<sup>d</sup> Model 1 was a crude model.

<sup>e</sup> Model 2 was adjusted for age, sex, and BMI.

<sup>f</sup> Model 3 was further adjusted for ethnicity, education levels, Townsend deprivation index, smoking status, drinking status, physical activity, total energy intake, history of diseases (hypertension, diabetes, CVD, and cancer), use of anti-hypertensive and cholesterol-lowering medications, CKD-GRS, baseline CRP, the first 10 principal components of ancestry, the genotype measurement batch, and baseline eGFR.

**Supplementary Table 11.** Associations between the DI-GM and the risk of CKD using competing risk regression (n=166,364) <sup>a</sup>.

| □                      | DI-GM            |                                |                   |                   | <i>P</i> for trend <sup>b</sup> |
|------------------------|------------------|--------------------------------|-------------------|-------------------|---------------------------------|
|                        | 0-3              | 4                              | 5                 | ≥ 6               |                                 |
| Number of participants | 54,747           | 34,904                         | 31,705            | 45,008            | -                               |
| Number of cases        | 1,547            | 833                            | 717               | 880               | -                               |
| Person-years           | 502,093          | 322,627                        | 292,082           | 411,981           | -                               |
| Model 1 <sup>d</sup>   | 1.00 (reference) | 0.84 (0.77, 0.91) <sup>c</sup> | 0.80 (0.73, 0.87) | 0.70 (0.64, 0.76) | <0.0001                         |
| Model 2 <sup>e</sup>   | 1.00 (reference) | 0.79 (0.72, 0.86)              | 0.75 (0.69, 0.82) | 0.68 (0.62, 0.74) | <0.0001                         |
| Model 3 <sup>f</sup>   | 1.00 (reference) | 0.81 (0.74, 0.88)              | 0.79 (0.72, 0.87) | 0.74 (0.68, 0.80) | <0.0001                         |

<sup>a</sup> Abbreviations: DI-GM, dietary index for gut microbiota; CKD, chronic kidney disease; eGFR, estimated glomerular filtration rate; BMI, body mass index; CVD, cardiovascular disease; GRS, genetic risk score; CRP, C-reactive protein.

<sup>b</sup> Calculated by using DI-GM as a continuous variable.

<sup>c</sup> Hazard ratios (95% confidence interval) (all such values).

<sup>d</sup> Model 1 was a crude model.

<sup>e</sup> Model 2 was adjusted for age, sex, and BMI.

<sup>f</sup> Model 3 was further adjusted for ethnicity, education levels, Townsend deprivation index, smoking status, drinking status, physical activity, total energy intake, history of diseases (hypertension, diabetes, CVD, and cancer), use of anti-hypertensive and cholesterol-lowering medications, CKD-GRS, baseline CRP, the first 10 principal components of ancestry, and the genotype measurement batch.

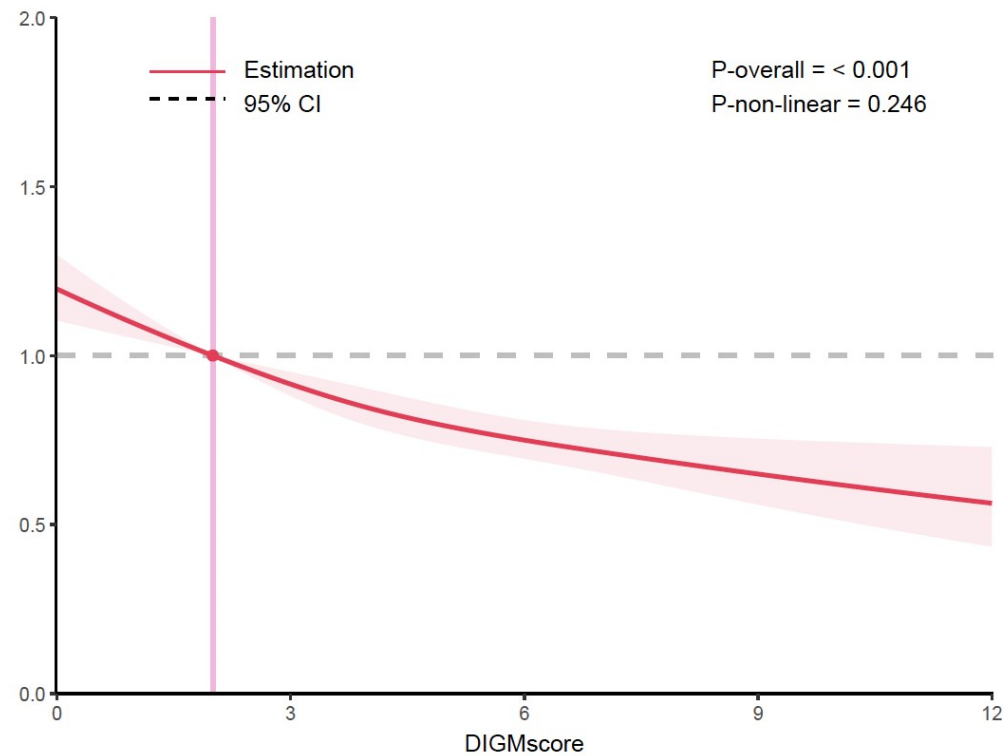

**Supplementary Figure 3.** The dose-response association between the DI-GM and risk of CKD diabetes using restricted cubic spline with three knots.

Abbreviations: DI-GM, dietary index for gut microbiota; CKD, chronic kidney disease; HR, hazard ratio; CI, confidence interval; BMI, body mass index; CVD, cardiovascular disease; GRS, genetic risk score; CRP, C-reactive protein.

The model was adjusted for age, sex, BMI, ethnicity, education levels, Townsend deprivation index, smoking status, drinking status, physical activity, total energy intake, history of diseases (hypertension, diabetes, CVD, and cancer), use of anti-hypertensive and cholesterol-lowering medications, CKD-GRS, baseline CRP, the first 10 principal components of ancestry, and the genotype measurement batch.

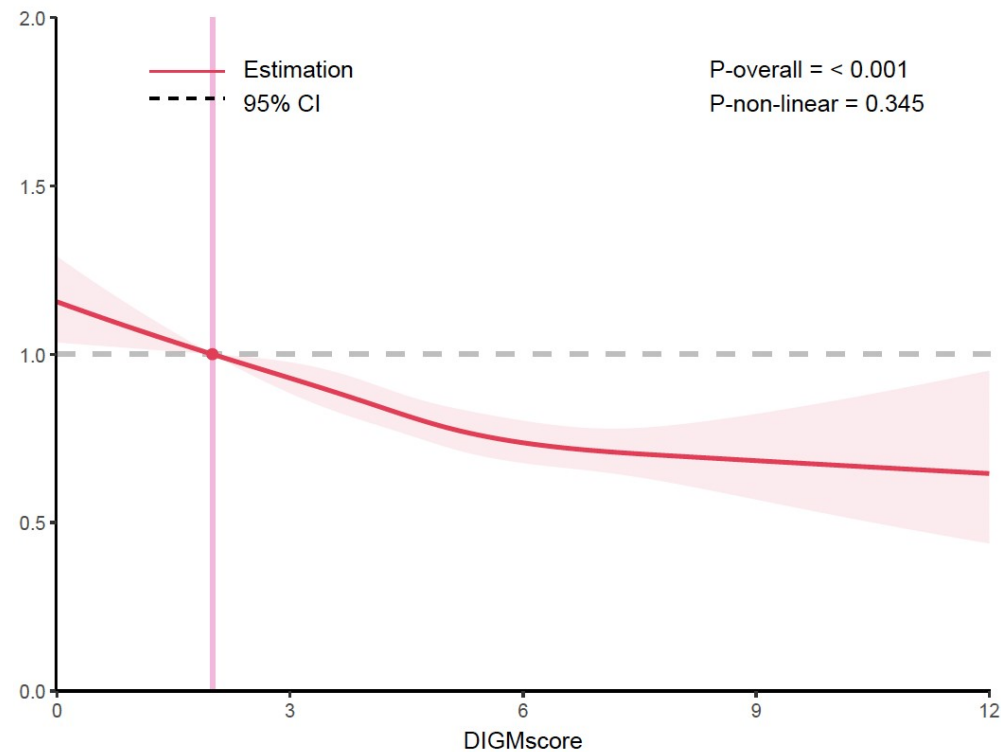

**Supplementary Figure 4.** The dose-response association between the DI-GM and risk of CKD diabetes using restricted cubic spline with four knots.

Abbreviations: DI-GM, dietary index for gut microbiota; CKD, chronic kidney disease; HR, hazard ratio; CI, confidence interval; BMI, body mass index; CVD, cardiovascular disease; GRS, genetic risk score; CRP, C-reactive protein.

The model was adjusted for age, sex, BMI, ethnicity, education levels, Townsend deprivation index, smoking status, drinking status, physical activity, total energy intake, history of diseases (hypertension, diabetes, CVD, and cancer), use of anti-hypertensive and cholesterol-lowering medications, CKD-GRS, baseline CRP, the first 10 principal components of ancestry, and the genotype measurement batch.

**Supplementary Table 12.** Associations between the DI-GM and the risk of CKD including participants lost to follow-up (n=166,821) <sup>a</sup>.

| □                      | DI-GM            |                                |                   |                   | <i>P</i> for trend <sup>b</sup> |
|------------------------|------------------|--------------------------------|-------------------|-------------------|---------------------------------|
|                        | 0-3              | 4                              | 5                 | ≥ 6               |                                 |
| Number of participants | 54,893           | 35,004                         | 31,799            | 45,125            | -                               |
| Number of cases        | 1,547            | 833                            | 717               | 880               | -                               |
| Person-years           | 503,054          | 323,284                        | 292,704           | 412,734           | -                               |
| Model 1 <sup>d</sup>   | 1.00 (reference) | 0.84 (0.77, 0.91) <sup>c</sup> | 0.80 (0.73, 0.87) | 0.70 (0.64, 0.76) | <0.0001                         |
| Model 2 <sup>e</sup>   | 1.00 (reference) | 0.78 (0.72, 0.85)              | 0.75 (0.68, 0.82) | 0.67 (0.62, 0.73) | <0.0001                         |
| Model 3 <sup>f</sup>   | 1.00 (reference) | 0.81 (0.74, 0.88)              | 0.79 (0.72, 0.86) | 0.73 (0.67, 0.80) | <0.0001                         |

<sup>a</sup> Abbreviations: DI-GM, dietary index for gut microbiota; CKD, chronic kidney disease; eGFR, estimated glomerular filtration rate; BMI, body mass index; CVD, cardiovascular disease; GRS, genetic risk score; CRP, C-reactive protein.

<sup>b</sup> Calculated by using DI-GM as a continuous variable.

<sup>c</sup> Hazard ratios (95% confidence interval) (all such values).

<sup>d</sup> Model 1 was a crude model.

<sup>e</sup> Model 2 was adjusted for age, sex, and BMI.

<sup>f</sup> Model 3 was further adjusted for ethnicity, education levels, Townsend deprivation index, smoking status, drinking status, physical activity, total energy intake, history of diseases (hypertension, diabetes, CVD, and cancer), use of anti-hypertensive and cholesterol-lowering medications, CKD-GRS, baseline CRP, the first 10 principal components of ancestry, and the genotype measurement batch.

**Supplementary Table 13.** Associations between the DI-GM and the risk of CKD further adjusted for history of antibiotic use, history of bowel resection surgery, and IBD (n=166,364) <sup>a</sup>.

| □                      | DI-GM            |                                |                   |                   | <i>P</i> for trend <sup>b</sup> |
|------------------------|------------------|--------------------------------|-------------------|-------------------|---------------------------------|
|                        | 0-3              | 4                              | 5                 | ≥ 6               |                                 |
| Number of participants | 54,747           | 34,904                         | 31,705            | 45,008            | -                               |
| Number of cases        | 1,547            | 833                            | 717               | 880               | -                               |
| Person-years           | 502,093          | 322,627                        | 292,082           | 411,981           | -                               |
| Model 1 <sup>d</sup>   | 1.00 (reference) | 0.84 (0.77, 0.91) <sup>c</sup> | 0.80 (0.73, 0.87) | 0.70 (0.64, 0.76) | <0.0001                         |
| Model 2 <sup>e</sup>   | 1.00 (reference) | 0.78 (0.72, 0.85)              | 0.75 (0.68, 0.82) | 0.67 (0.62, 0.73) | <0.0001                         |
| Model 3 <sup>f</sup>   | 1.00 (reference) | 0.81 (0.74, 0.88)              | 0.79 (0.72, 0.86) | 0.74 (0.68, 0.80) | <0.0001                         |

<sup>a</sup> Abbreviations: DI-GM, dietary index for gut microbiota; CKD, chronic kidney disease; BMI, body mass index; CVD, cardiovascular disease; GRS, genetic risk score; CRP, C-reactive protein, IBD, inflammatory bowel disease.

<sup>b</sup> Calculated by using DI-GM as a continuous variable.

<sup>c</sup> Hazard ratios (95% confidence interval) (all such values).

<sup>d</sup> Model 1 was a crude model.

<sup>e</sup> Model 2 was adjusted for age, sex, and BMI.

<sup>f</sup> Model 3 was further adjusted for ethnicity, education levels, Townsend deprivation index, smoking status, drinking status, physical activity, total energy intake, history of diseases (hypertension, diabetes, CVD, and cancer), use of anti-hypertensive and cholesterol-lowering medications, CKD-GRS, baseline CRP, the first 10 principal components of ancestry, the genotype measurement batch, history of antibiotic use, history of bowel resection surgery, and IBD.

**Supplementary Table 14.** Associations between the DI-GM and the risk of CKD excluding participants who history of antibiotic use, history of bowel resection surgery, and IBD (n=151,160) <sup>a</sup>.

| □                      | DI-GM            |                                |                   |                   | <i>P</i> for trend <sup>b</sup> |
|------------------------|------------------|--------------------------------|-------------------|-------------------|---------------------------------|
|                        | 0-3              | 4                              | 5                 | ≥ 6               |                                 |
| Number of participants | 49,764           | 31,796                         | 28,876            | 40,724            | -                               |
| Number of cases        | 1,395            | 749                            | 657               | 806               | -                               |
| Person-years           | 456,275          | 294,104                        | 265,994           | 372,705           | -                               |
| Model 1 <sup>d</sup>   | 1.00 (reference) | 0.83 (0.76, 0.91) <sup>c</sup> | 0.81 (0.74, 0.89) | 0.71 (0.65, 0.78) | <0.0001                         |
| Model 2 <sup>e</sup>   | 1.00 (reference) | 0.78 (0.71, 0.85)              | 0.75 (0.69, 0.83) | 0.68 (0.63, 0.75) | <0.0001                         |
| Model 3 <sup>f</sup>   | 1.00 (reference) | 0.80 (0.73, 0.87)              | 0.79 (0.72, 0.87) | 0.74 (0.68, 0.81) | <0.0001                         |

<sup>a</sup> Abbreviations: DI-GM, dietary index for gut microbiota; CKD, chronic kidney disease; BMI, body mass index; CVD, cardiovascular disease; GRS, genetic risk score; CRP, C-reactive protein, IBD, inflammatory bowel disease.

<sup>b</sup> Calculated by using DI-GM as a continuous variable.

<sup>c</sup> Hazard ratios (95% confidence interval) (all such values).

<sup>d</sup> Model 1 was a crude model.

<sup>e</sup> Model 2 was adjusted for age, sex, and BMI.

<sup>f</sup> Model 3 was further adjusted for ethnicity, education levels, Townsend deprivation index, smoking status, drinking status, physical activity, total energy intake, history of diseases (hypertension, diabetes, CVD, and cancer), use of anti-hypertensive and cholesterol-lowering medications, CKD-GRS, baseline CRP, the first 10 principal components of ancestry, the genotype measurement batch, history of antibiotic use, history of bowel resection surgery, and IBD.

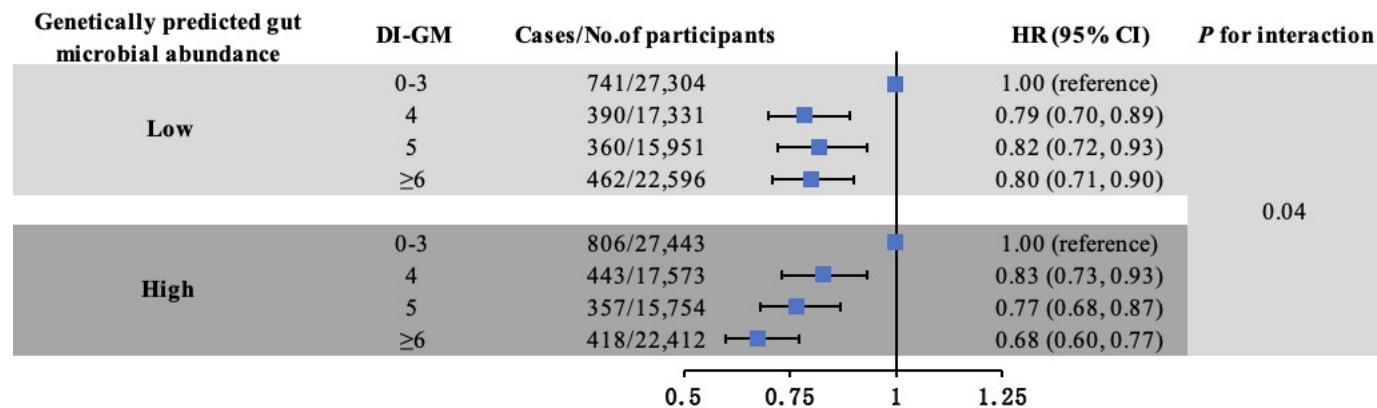

**Supplementary Figure 5.** Associations of the DI-GM with the risk of CKD according to genetically predicted gut microbial abundance, additionally adjusted for antibiotic use, bowel resection surgery, and IBD history.

Abbreviations: DI-GM, dietary index for gut microbiota; CKD, chronic kidney disease; HR, hazard ratio; CI, confidence interval; BMI, body mass index; CVD, cardiovascular disease; GRS, genetic risk score; CRP, C-reactive protein; IBD, inflammatory bowel disease.

The model was adjusted for age, sex, BMI, ethnicity, education levels, Townsend deprivation index, smoking status, drinking status, physical activity, total energy intake, history of diseases (hypertension, diabetes, CVD, and cancer), use of anti-hypertensive and cholesterol-lowering medications, CKD-GRS, baseline CRP, the first 10 principal components of ancestry, the genotype measurement batch, genetically predicted gut microbial abundance, history of antibiotic use, history of bowel resection surgery, and IBD.

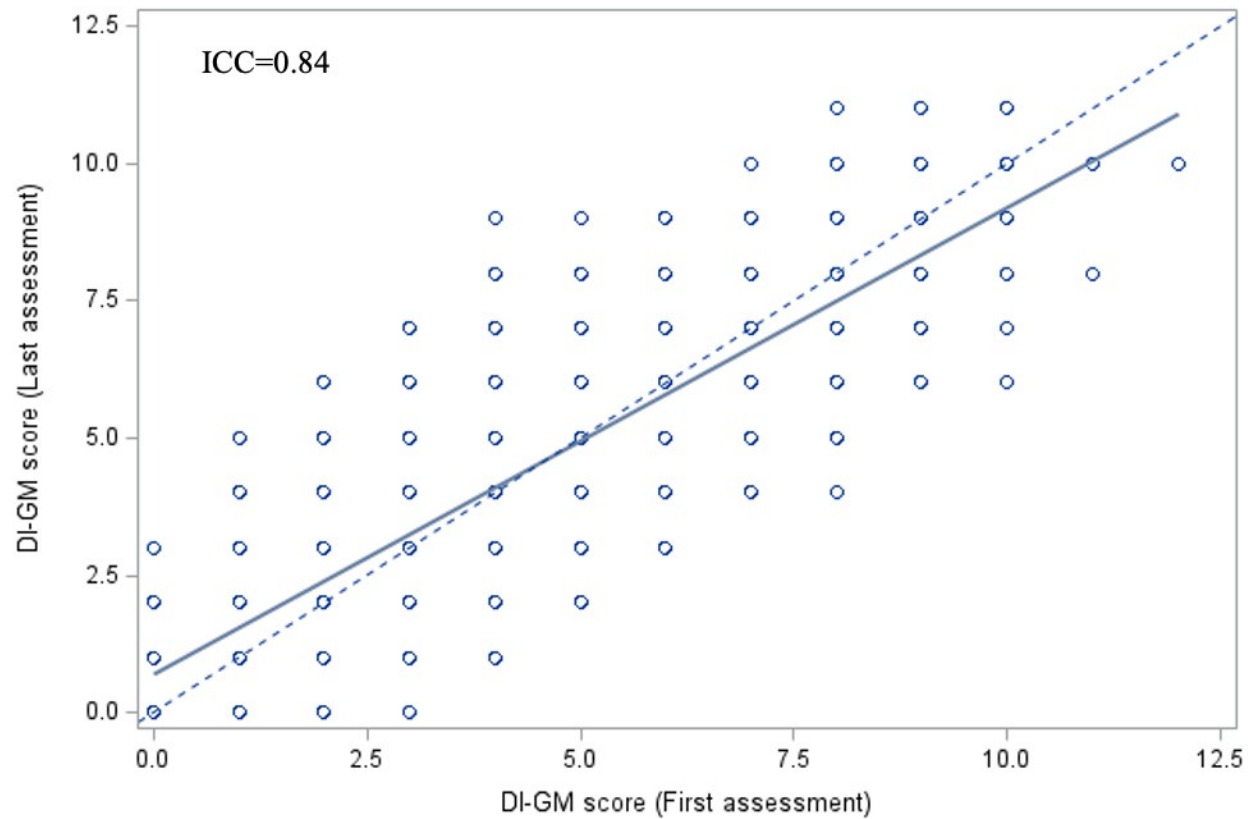

**Supplementary Figure 6.** Reproducibility of the DI-GM score across repeated dietary assessments

Abbreviations: DI-GM, dietary index for gut microbiota; intraclass correlation coefficient, ICC.

Each point represents an individual participant with at least two dietary assessments. The DI-GM scores were calculated separately based on the first and the last dietary questionnaires. The dashed line indicates the line of identity ( $y = x$ ), and the solid line represents the fitted regression line.
